# Supplementary figures and images for: Ion emission from 1–10 MDa salt clusters: individual charge state resolution with charge detection mass spectrometry
Source: Royal Society of Chemistry journal article supplement (doi:10.1039/d3an01913f), 2024-01-01

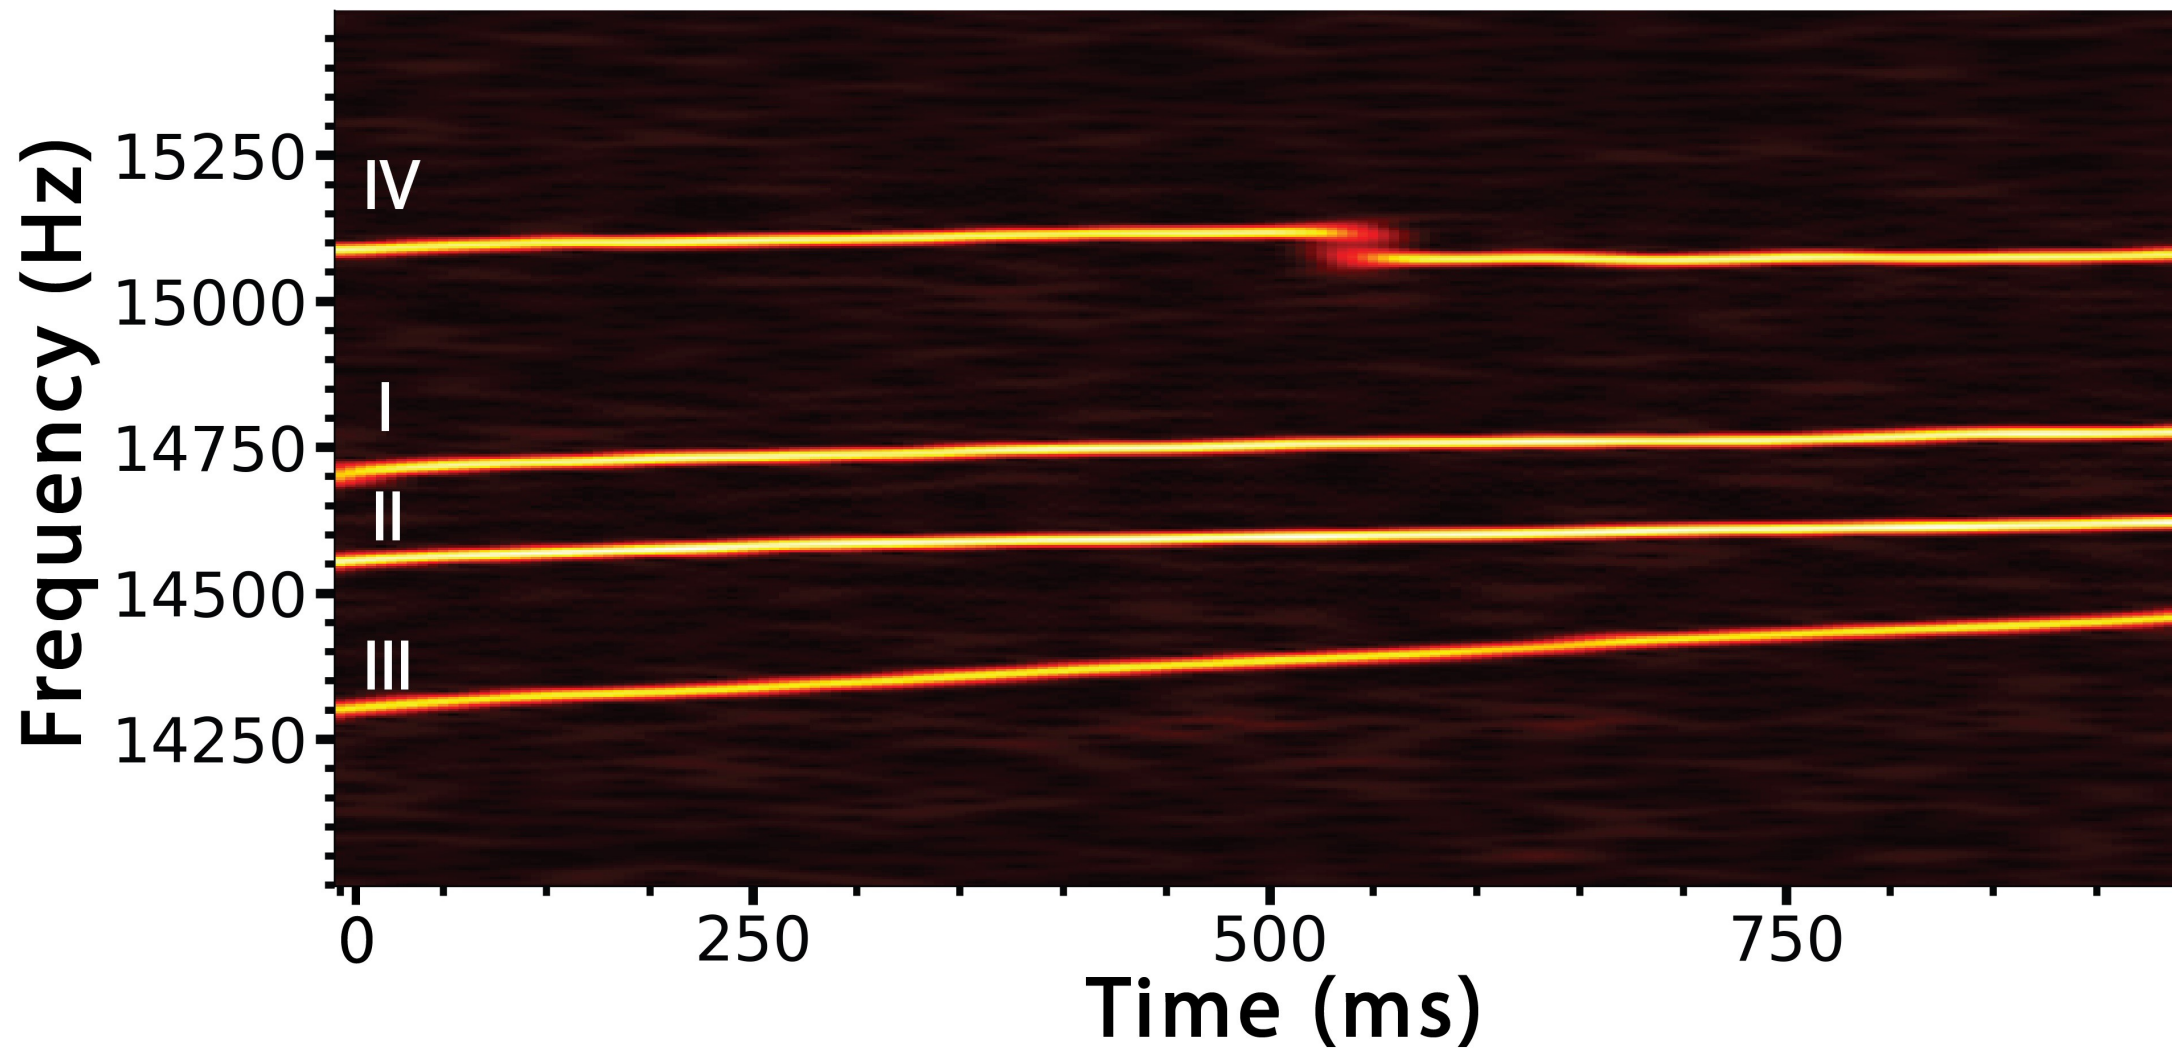

Supplement: d3an01913f3.pdf [file d3an01913f3.pdf]

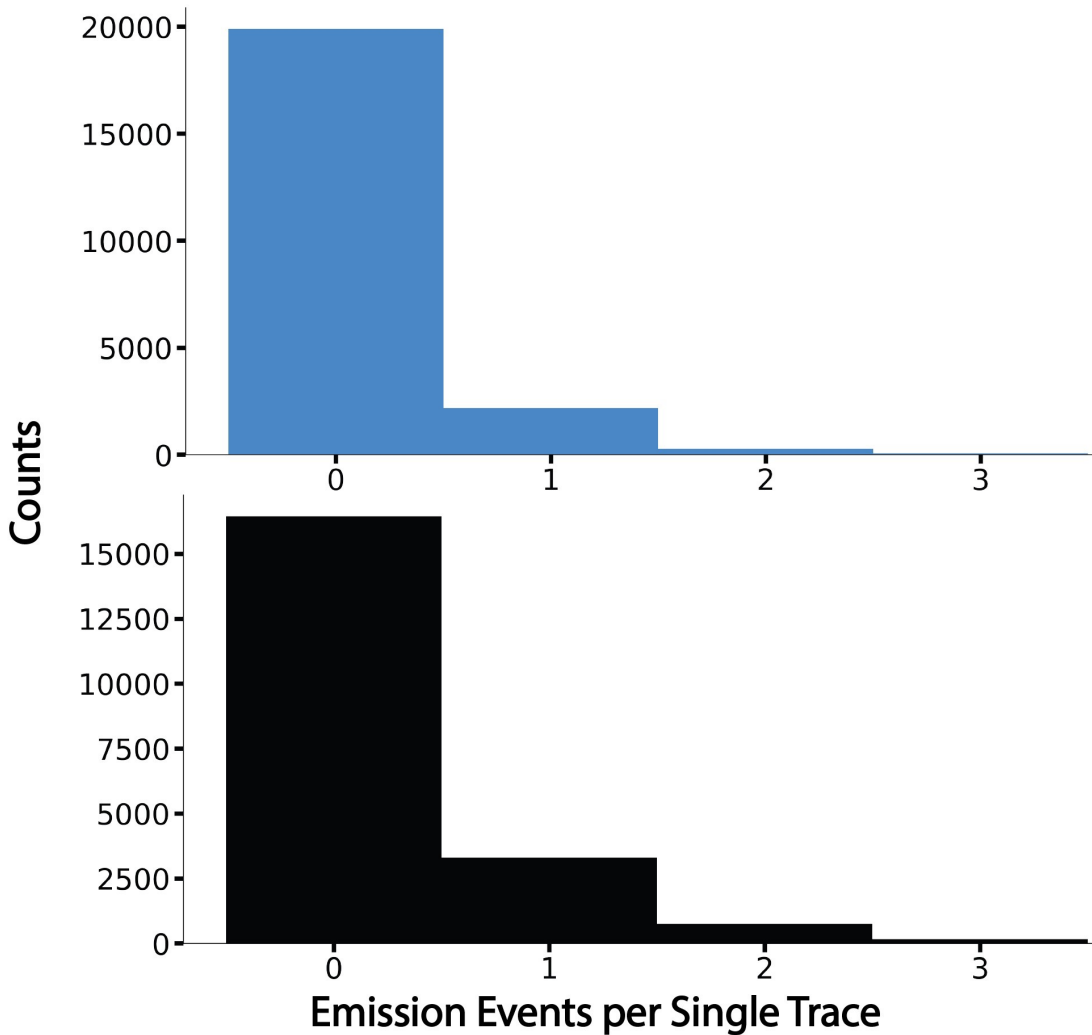

Supplement: d3an01913f4.pdf [file d3an01913f4.pdf]
